# Supplementary material for: Modular design of a zwitterionic organocatalyst for bulk ring-opening polymerization of cyclic esters
Source: Royal Society of Chemistry journal article supplement (doi:10.1039/d4py00678j), 2024-01-01
Supplement: d4py00678j1.pdf [file d4py00678j1.pdf]

## Supporting information

### **Modular design of zwitterionic organocatalyst for bulk ring-opening polymerization of cyclic esters**

Fengzhen Guo<sup>a</sup>, Peng Guo<sup>b</sup>, Zhenjiang Li<sup>a\*</sup>, Yaling Yin<sup>a</sup>, Hui Yu<sup>a</sup>, Shaoju Cao<sup>a</sup>, Chunyu Li<sup>a</sup>, Xin Zou<sup>a</sup>, Mingfu Lyu<sup>b</sup>, Kai Guo<sup>a</sup>

<sup>a</sup>State Key Laboratory Materials-Oriented Chemical Engineering, College of Biotechnology and Pharmaceutical Engineering, Nanjing Tech University, 30 Puzhu Road South, Nanjing 211816, China.

<sup>b</sup>Beijing Research Institute of Chemical Industry, SINOPEC, Beijing 100013, P. R. China.

#### **Contents**

|                                                                                                                                        |       |
|----------------------------------------------------------------------------------------------------------------------------------------|-------|
| Preparation of the phosphonium carboxybetaine catalysts .....                                                                          | S1-S3 |
| Preparation of ionic pair consisting of phosphonium cation and carboxylate anion.....                                                  | S3    |
| <sup>1</sup> H NMR spectrum of 3-(triphenylphosphonio) propanoate. ....                                                                | S5    |
| <sup>13</sup> C NMR spectrum of 3-(triphenylphosphonio) propanoate .....                                                               | S5    |
| <sup>31</sup> P NMR spectrum of 3-(triphenylphosphonio) propanoate .....                                                               | S6    |
| TGA of 3-(triphenylphosphonio) propanoate .....                                                                                        | S6    |
| MALDI-TOF MS spectrum of the obtained PLLA .....                                                                                       | S7    |
| The isotacticity of PLLA was calculated by <sup>1</sup> H NMR spectrum in CDCl <sub>3</sub> .....                                      | S7    |
| <sup>1</sup> H NMR spectrum (CDCl <sub>3</sub> , 400 MHz) of poly (δ-valerolactone) .....                                              | S8    |
| <sup>13</sup> C NMR spectrum (CDCl <sub>3</sub> , 101 MHz) of poly (δ-valerolactone).....                                              | S8    |
| The <sup>1</sup> H NMR of diblock of copolymerization of VL and LA in CDCl <sub>3</sub> .....                                          | S9    |
| <sup>1</sup> H NMR spectrum of PPA in CDCl <sub>3</sub> in the presence of varied amounts of 3-(triphenylphosphonio) propanoate .....  | S9    |
| <sup>13</sup> C NMR spectrum of LLA in CDCl <sub>3</sub> in the presence of varied amounts of 3-(triphenylphosphonio) propanoate ..... | S10   |
| <sup>1</sup> H NMR spectrum of the α-C–H proton of 3-(triphenylphosphonio) in CDCl <sub>3</sub> .....                                  | S10   |
| <sup>13</sup> C NMR spectrum of the C–H carbon of LLA in CDCl <sub>3</sub> .....                                                       | S11   |
| DSC test of PLLA samples with different molecular weights.....                                                                         | S11   |
| Thermogravimetric analysis of quaternary phosphonium carboxybetaine .....                                                              | S12   |

## Preparation of the phosphonium carboxylate catalysts

### Preparation of 3-(tricyclohexylphosphonium) propionate (catalyst **3-Cy**)

3-(tricyclohexylphosphonium) propionate synthesis method: A magneton was added into a 50 mL round-bottomed flask and schlenk operation was performed. Tricyclohexylphosphine (2.80 g, 10 mmol, 1.0 eq) and chloroform solution (10 mL) were added in the inert gas state. In a closed system, acrylic acid (0.7 mL, 10 mmol, 1.0 eq) was slowly added with a syringe under stirring at room temperature, and the solution gradually turned pale yellow. Stirred at room temperature for 24 h, the reaction liquid was concentrated in vacuum and precipitated into a light yellow viscous liquid in ether. By dissolving a small amount of chloroform and washing with ether precipitation three times, the catalyst **3-Cy** was obtained as a white solid by vacuum drying (2.88 g, 82%). Catalyst **3-Bu** was prepared by this method.

### Preparation of 3-(triphenylphosphonium) propionate (catalyst **3-Ph**)

Catalyst **3-Ph** synthesis method: A magneton was added into a 50 mL round-bottom flask and schlenk operation was performed. Triphenylphosphine (2.62 g, 10 mmol, 1.0 eq) and ethyl acetoacetone solution (10 mL, v/v = 4:1) were added in the inert gas state. In a closed system, acrylic acid (0.7 mL, 10 mmol, 1.0 eq) was slowly added with a syringe under stirring at room temperature. After 1 h, white precipitate was slowly produced. Stir at room temperature for 24 h and strain to obtain white solid. After the ethyl ether was washed three times, the ethanol recrystallized and vacuum dried, the catalyst **3-Ph** was a white solid (2.90g, 87%). Catalyst **3-Ph-Me** and **3-Ph-OMe** were prepared by this method.

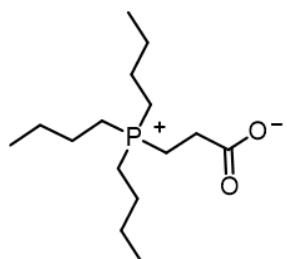

**3-(tributylphosphonium) propionate (catalyst 3-Bu)**, Oily liquid, yield: 72%. <sup>1</sup>H NMR (400

MHz,  $\text{CDCl}_3$ )  $\delta$  2.49 (dt,  $J = 19.9, 6.9$  Hz, 2H), 2.28 (dt,  $J = 11.7, 6.9$  Hz, 2H), 2.16 (ddt,  $J = 12.8, 9.5, 5.3$  Hz, 6H), 1.45 (tdd,  $J = 12.3, 9.5, 6.9$  Hz, 12H), 0.90 (t,  $J = 7.0$  Hz, 9H).  $^{13}\text{C}$  NMR (101 MHz,  $\text{CDCl}_3$ )  $\delta$  172.13, 171.99, 134.99, 134.96, 133.35, 133.25, 130.49, 130.37, 119.69, 118.83, 29.84, 29.79, 20.99, 20.47.  $^{31}\text{P}$  NMR (162 MHz,  $\text{CDCl}_3$ )  $\delta$  33.77.

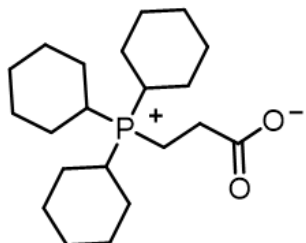

**3-(tricyclohexylphosphonium) propionate (catalyst 3-Cy)**, White solid, yield: 82%.  $^1\text{H}$  NMR (400 MHz,  $\text{DMSO}-d_6$ )  $\delta$  2.64-2.41 (m, 7H), 1.88-1.75 (m, 6H), 1.67-1.64 (m, 6H), 1.52-1.41 (m, 12H), 1.38-1.26 (m, 6H).  $^{13}\text{C}$  NMR (101 MHz,  $\text{DMSO}-d_6$ )  $\delta$  172.80, 172.68, 28.70, 28.29, 27.53, 27.49, 26.03, 25.98, 25.86, 25.00, 10.84, 10.39.  $^{31}\text{P}$  NMR (162 MHz,  $\text{DMSO}-d_6$ )  $\delta$  33.46.

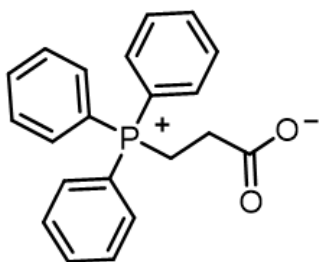

**3-(triphenylphosphonium) propionate (catalyst 3-Ph)**, White solid, yield: 87%.  $^1\text{H}$  NMR (400 MHz,  $\text{CDCl}_3$ )  $\delta$  7.75 (m, 3H), 7.61 (m, 12H), 3.53 (m, 2H), 2.55 (m, 2H).  $^{13}\text{C}$  NMR (101 MHz,  $\text{CDCl}_3$ )  $\delta$  172.13, 171.99, 134.99, 134.96, 133.35, 133.25, 130.49, 130.37, 119.69, 118.83, 29.84, 29.79, 20.99, 20.47.  $^{31}\text{P}$  NMR (162 MHz,  $\text{CDCl}_3$ )  $\delta$  23.89.

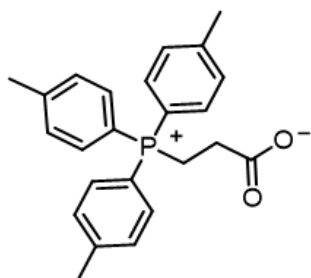

**3-(tri(4-methylphenyl) phosphonium) propionate (catalyst 3-Ph-Me)**, White solid, yield: 85%.  $^1\text{H}$  NMR (400 MHz,  $\text{DMSO}-d_6$ )  $\delta$  7.62 (m, 6H), 7.52 (m, 6H), 3.49 (m, 2H), 2.43 (s, 9H), 2.05 (m,

2H).  $^{13}\text{C}$  NMR (101 MHz,  $\text{DMSO-}d_6$ )  $\delta$  170.27, 170.12, 145.00, 144.97, 133.33, 133.22, 130.61, 130.49, 117.23, 116.35, 29.91, 29.86, 21.19, 19.28, 18.77.  $^{31}\text{P}$  NMR (162 MHz,  $\text{DMSO-}d_6$ )  $\delta$  23.09.

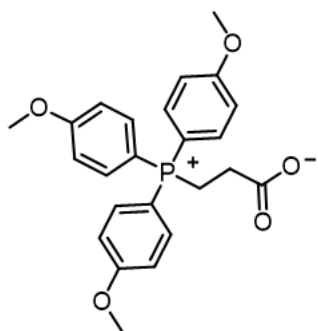

**3-(tri (4-methoxyphenyl) phosphonium) propionate (catalyst 3-Ph-OMe)**, White solid, yield: 89%.  $^1\text{H}$  NMR (400 MHz,  $\text{DMSO-}d_6$ )  $\delta$  7.65 (m, 6H), 7.26 (m, 6H), 3.87 (s, 9H), 3.4 (m, 2H), 2.04 (m, 2H).  $^{13}\text{C}$  NMR (101 MHz,  $\text{DMSO-}d_6$ )  $\delta$  171.26, 171.11, 163.77, 163.74, 135.43, 135.32, 115.81, 115.67, 110.72, 109.79, 55.83, 29.95, 29.91, 19.74, 19.22.  $^{31}\text{P}$  NMR (162 MHz,  $\text{DMSO-}d_6$ )  $\delta$  22.33.

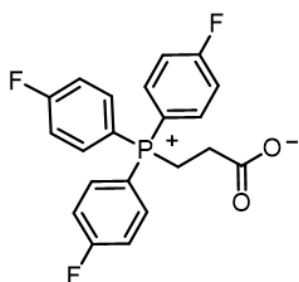

**3-(tri (4-fluorophenyl) phosphonium) propionate (catalyst 3-Ph-F)**, White solid, yield: 51%.  $^1\text{H}$  NMR (400 MHz,  $\text{DMSO-}d_6$ )  $\delta$  7.81 (m, 6H), 7.54 (m, 6H), 3.62 (m, 2H), 2.17 (m, 2H).  $^{13}\text{C}$  NMR (101 MHz,  $\text{DMSO-}d_6$ )  $\delta$  171.66, 171.53, 166.54, 166.51, 164.02, 163.98, 136.51, 136.40, 136.30, 118.69, 118.66, 117.77, 117.74, 117.43, 117.29, 117.21, 117.07, 29.83, 29.78, 20.53, 19.98.  $^{31}\text{P}$  NMR (162 MHz,  $\text{DMSO-}d_6$ )  $\delta$  19.92.  $^{19}\text{F}$  NMR (376 MHz,  $\text{DMSO-}d_6$ )  $\delta$  -104.12.

Preparation of ionic pair consisting of phosphonium cation and carboxylate anion

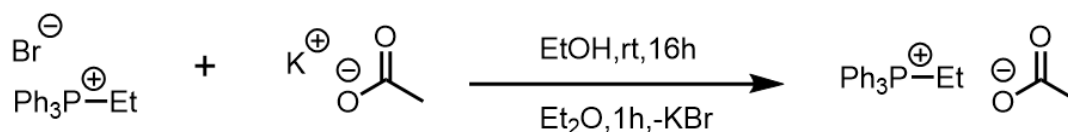

To a dry 25 mL Schlenk flask, ethyl triphenylphosphine bromide (1.11 g, 3 mmol) was added under a nitrogen atmosphere and the salt was dried under reduced

pressure. Dry EtOH (4 mL) was added to give a ca. 0.6 M solution of the salt. Under agitation, a solution of potassium acetate in dry EtOH (1.00 M, 3 mL, 3 mmol) was added slowly over the course of 20 minutes and the resultant mixture was stirred for 16 hours. Then, dry Et<sub>2</sub>O (16 mL) was added and the precipitate of KBr was allowed to settle for one hour. Remove the EtOH-Et<sub>2</sub>O. The solvent was removed *in vacuo* to yield a syrupy material. Et<sub>2</sub>O (8 mL) was added to precipitate the product into a white solid. The ethereal layer was removed and the solid dried to give product as a fine, crystalline powder (1.28 g, 92%). **<sup>1</sup>H NMR** (400 MHz, DMSO-*d*<sub>6</sub>) δ 7.90 (ddt, 3H), 7.84 – 7.74 (m, 12H), 3.66 – 3.55 (m, 2H), 1.56 (s, 3H), 1.22 (dd, 3H)ppm; **<sup>13</sup>C NMR** (101 MHz, DMSO-*d*<sub>6</sub>) δ 171.21, 133.66, 133.56, 130.30, 119.18, 25.98, 18.54, 7.25 ppm; **<sup>31</sup>P NMR** (162 MHz, DMSO-*d*<sub>6</sub>) δ 28.53.

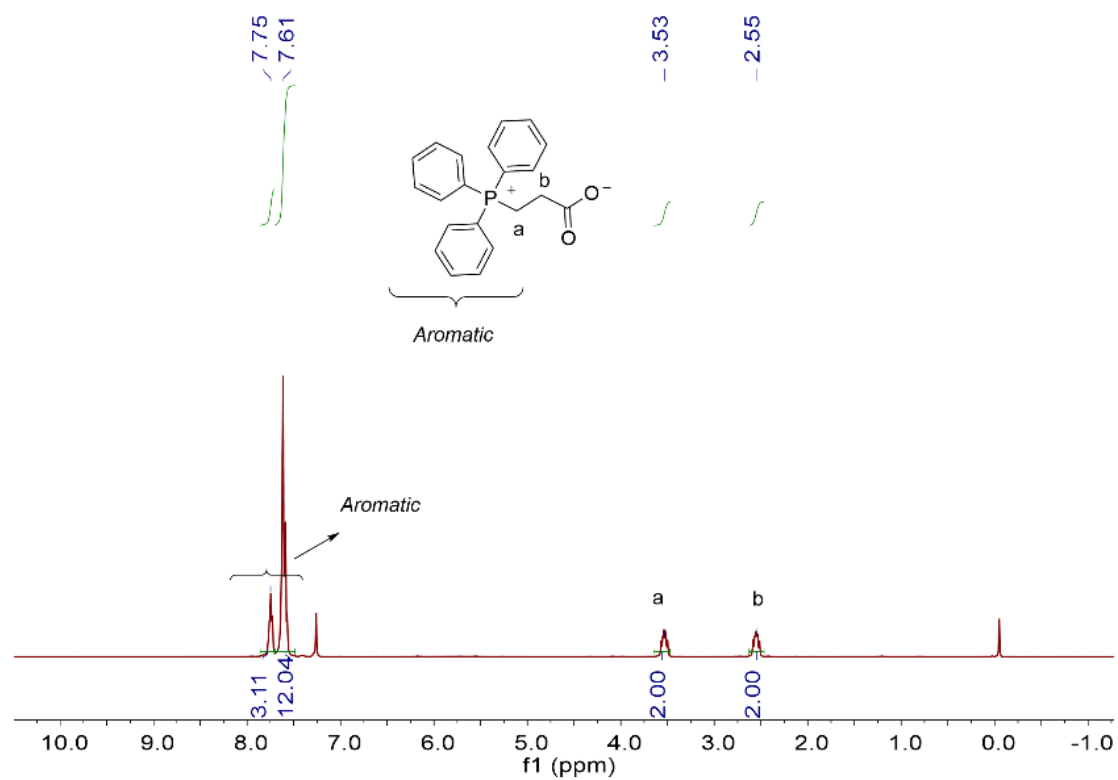

**Figure S1.**  $^1\text{H}$  NMR spectrum ( $\text{CDCl}_3$ , 400 MHz) of 3-(triphenylphosphonio) propanoate.

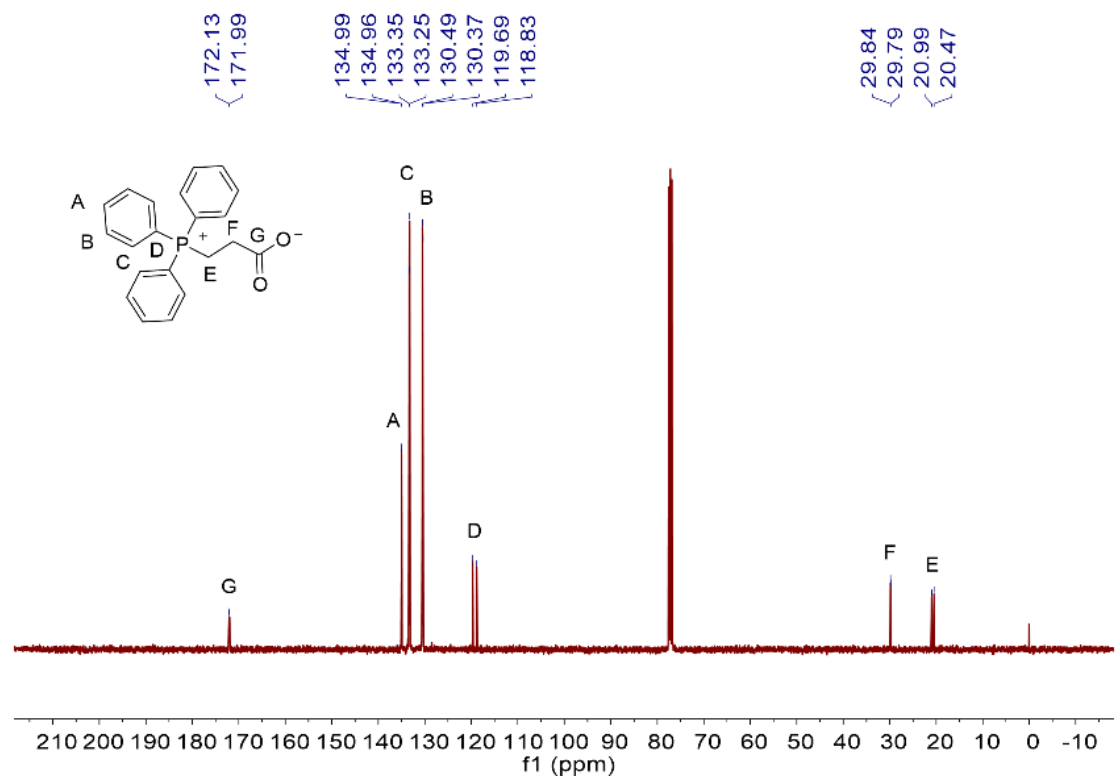

**Figure S2.**  $^{13}\text{C}$  NMR spectrum ( $\text{CDCl}_3$ , 101 MHz) of 3-(triphenylphosphonio) propanoate.

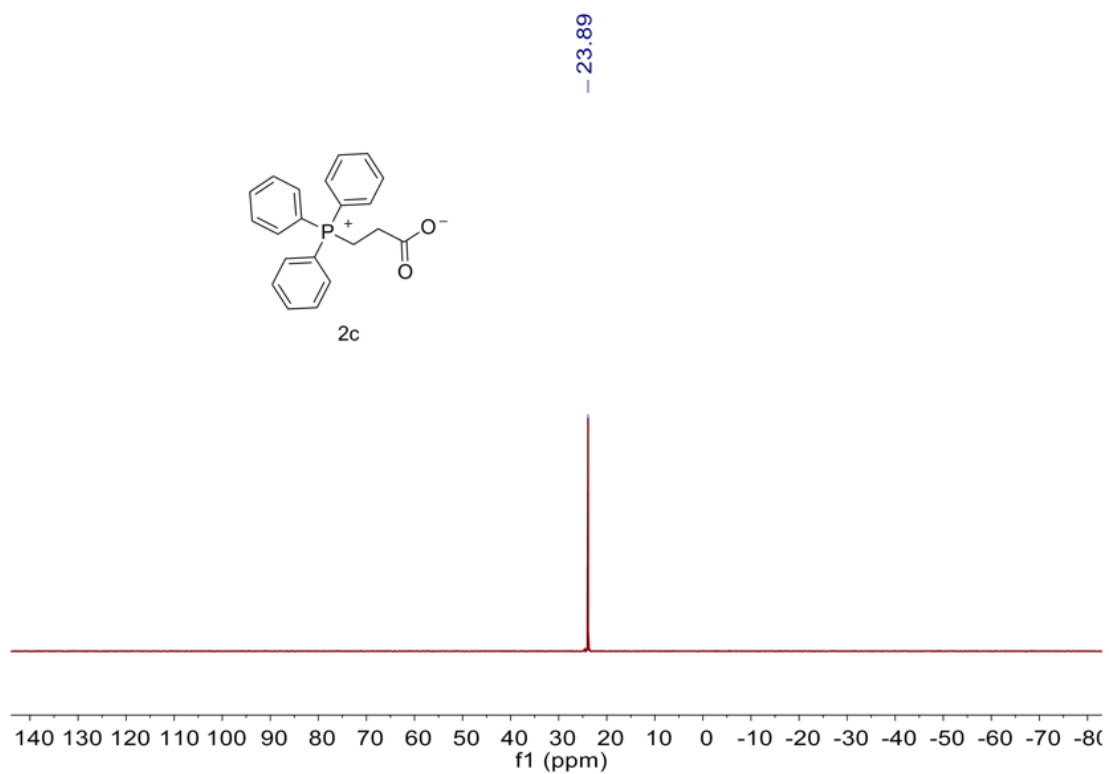

Figure S3. <sup>31</sup>P NMR spectrum (CDCl<sub>3</sub>, 162 MHz) of 3-(triphenylphosphonio) propanoate.

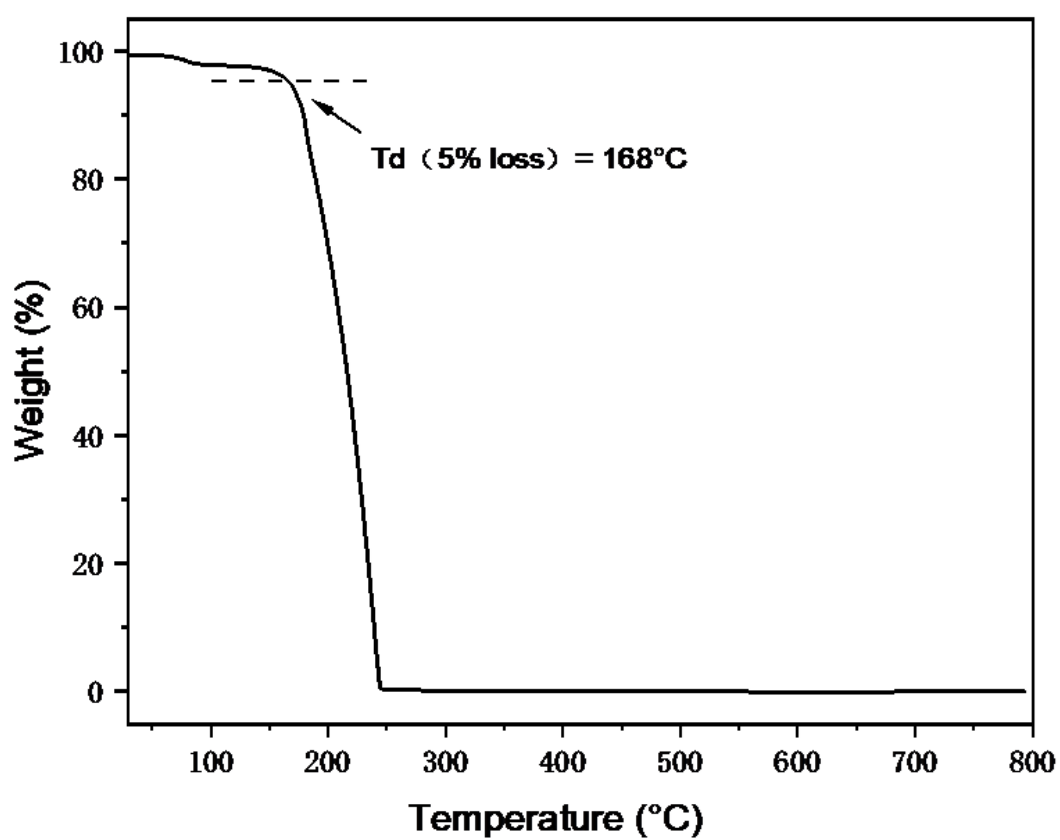

Figure S4. TGA of 3-(triphenylphosphonio) propanoate.

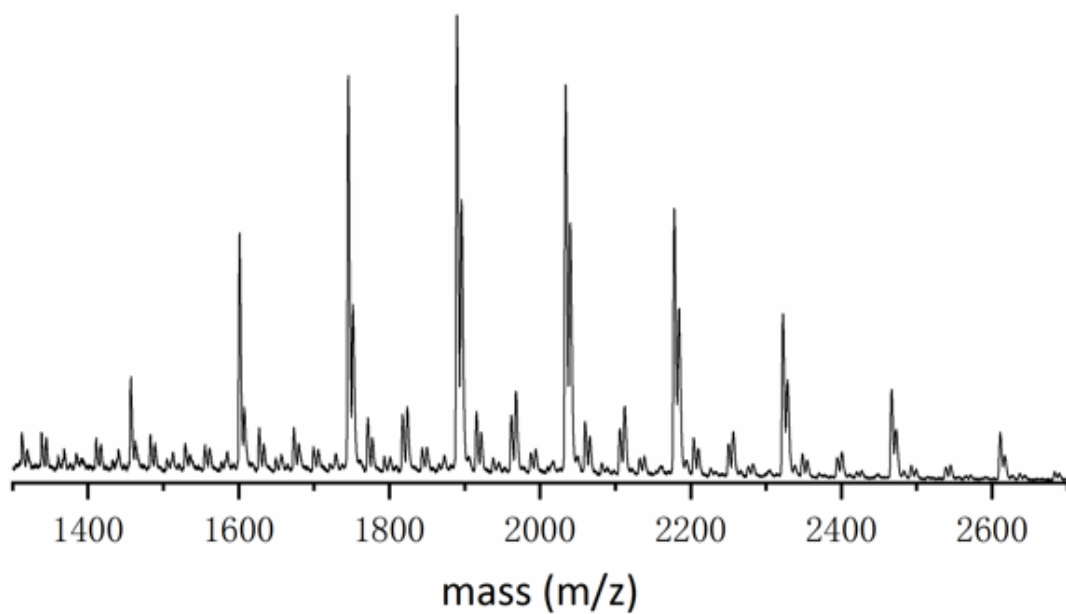

**Figure S5.** MALDI-TOF MS spectrum of the obtained PLLA ([LLA]/[PPA]/[3-Ph] = 25, 140°C, conversion = 70%,  $M_{n, NMR} = 2.3 \text{ kg}\cdot\text{mol}^{-1}$ ,  $\mathcal{D} = 1.13$ ).

**Figure S6.** The isotacticity of PLLA was calculated by  $^1\text{H}$  NMR spectrum in  $\text{CDCl}_3$ . The isotacticity  $P_m = 0.72$ .

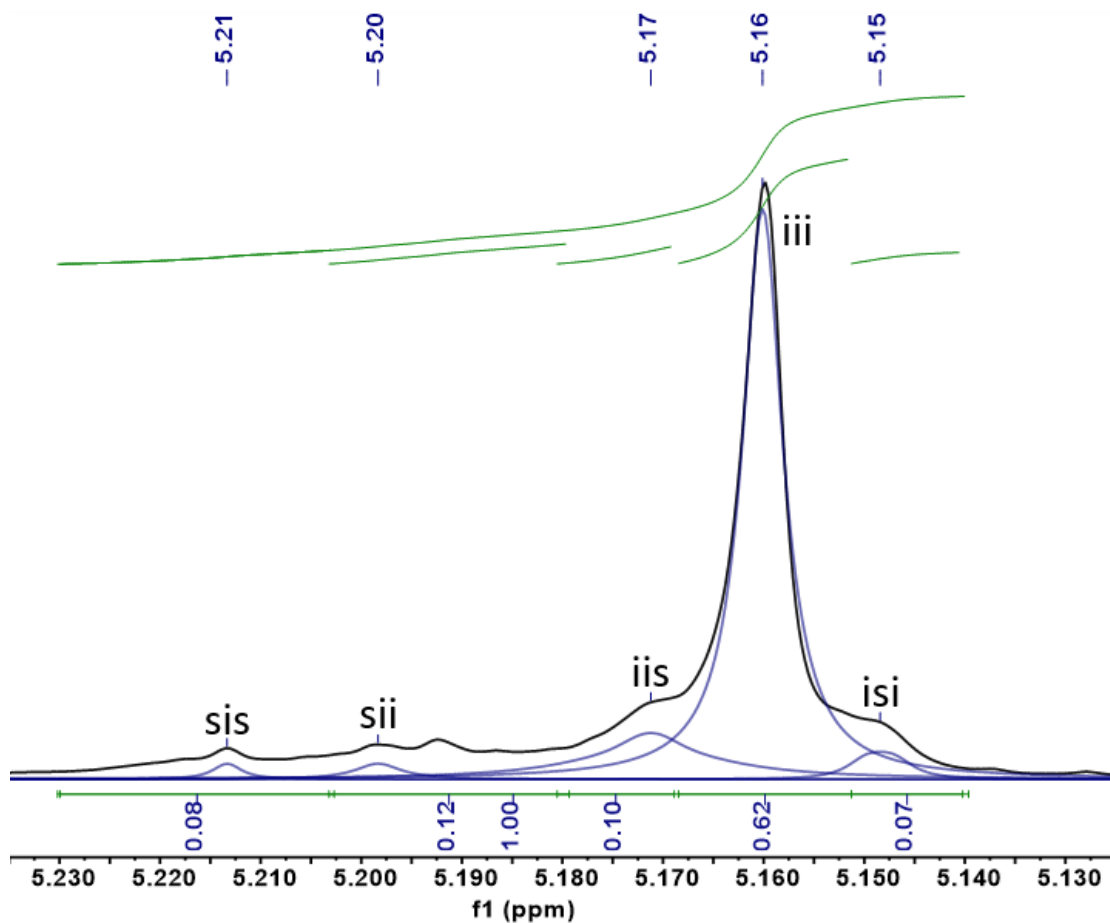



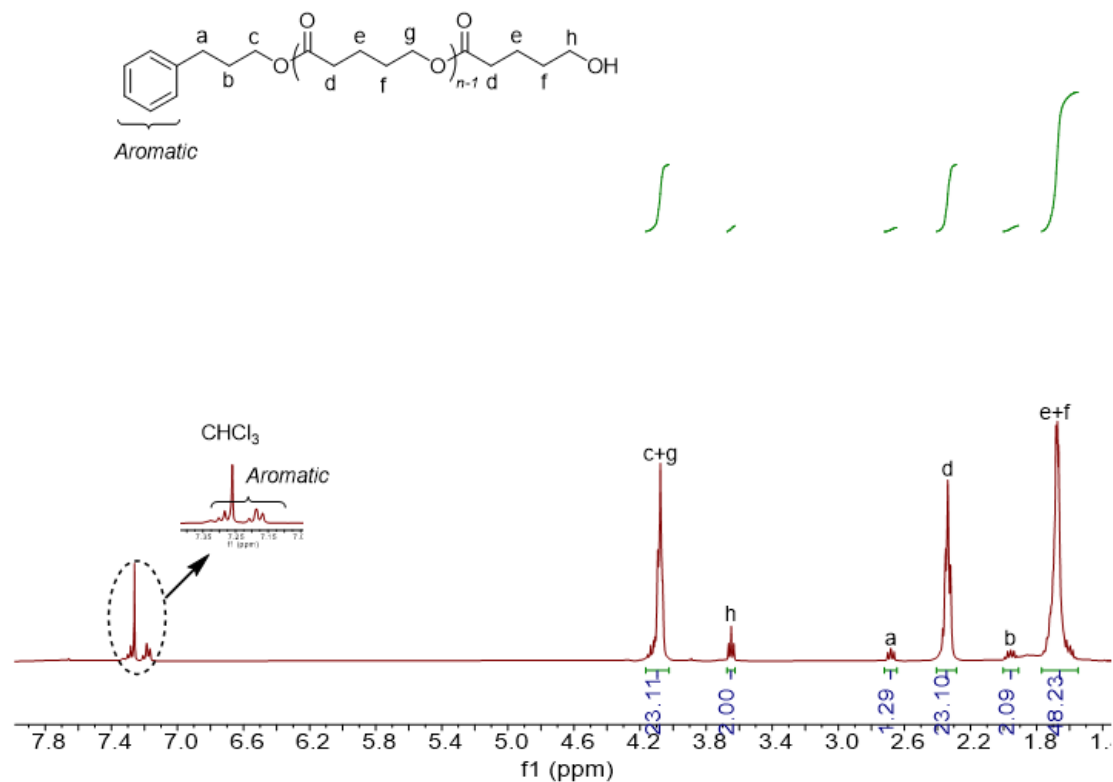

Figure S7.  $^1\text{H}$  NMR spectrum (CDCl<sub>3</sub>, 400 MHz) of poly( $\delta$ -valerolactone).

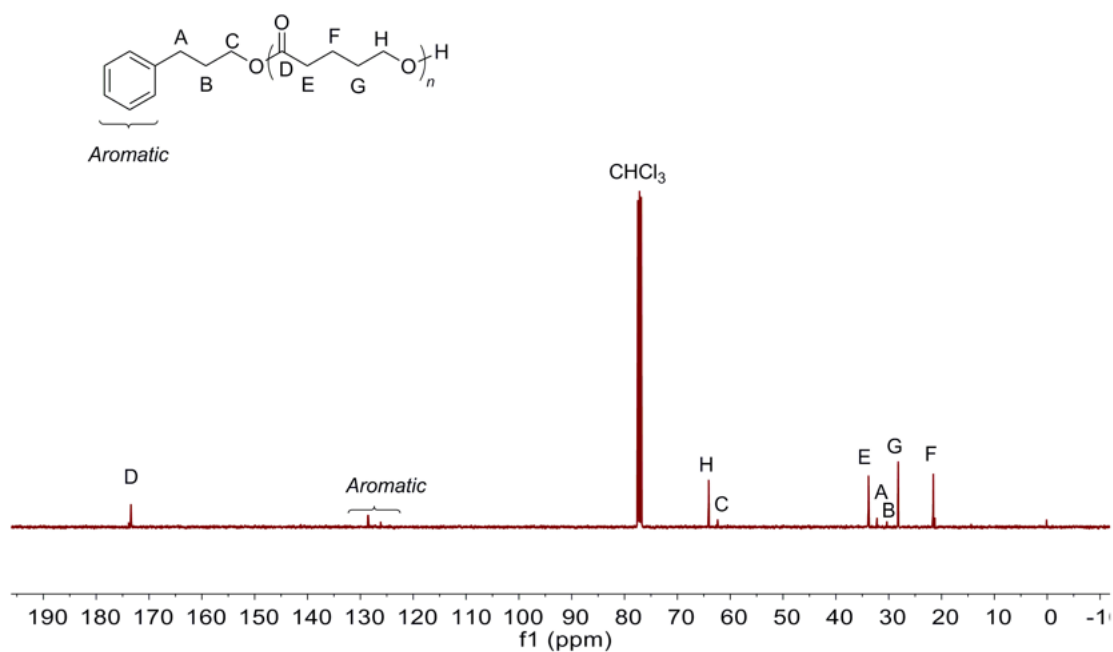

Figure S8.  $^{13}\text{C}$  NMR spectrum (CDCl<sub>3</sub>, 101 MHz) of poly( $\delta$ -valerolactone).

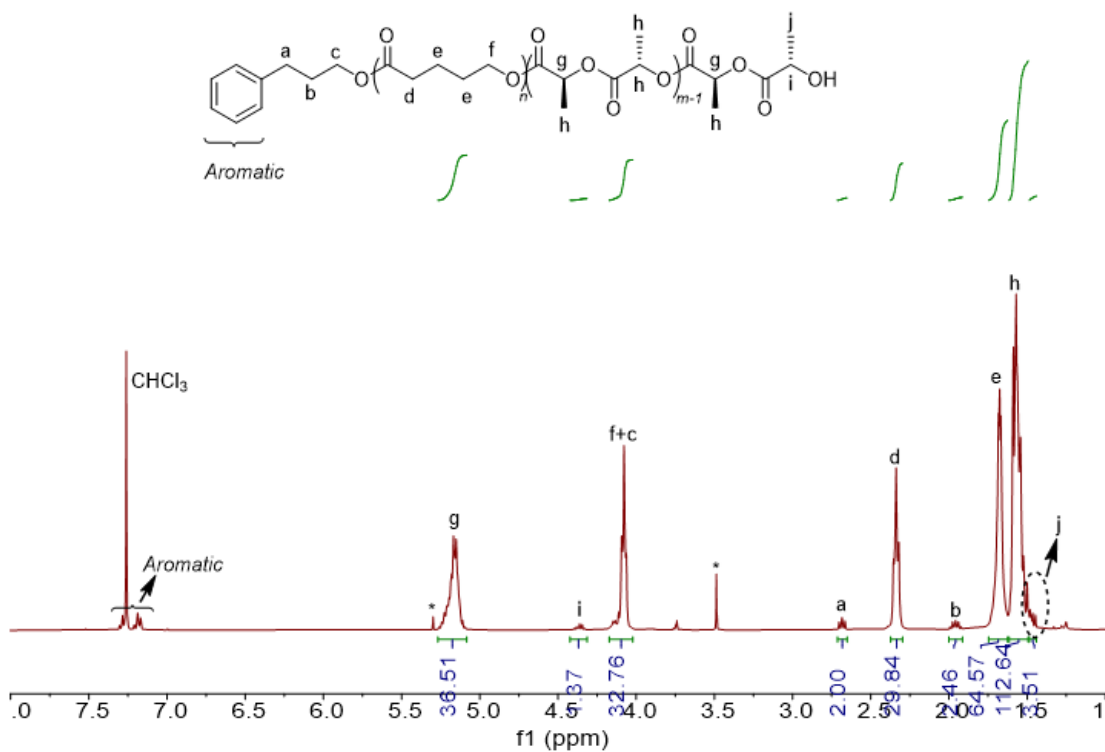

**Figure S9.**  $^1\text{H}$  NMR spectrum of PVL-*b*-PLLA in  $\text{CDCl}_3$ .

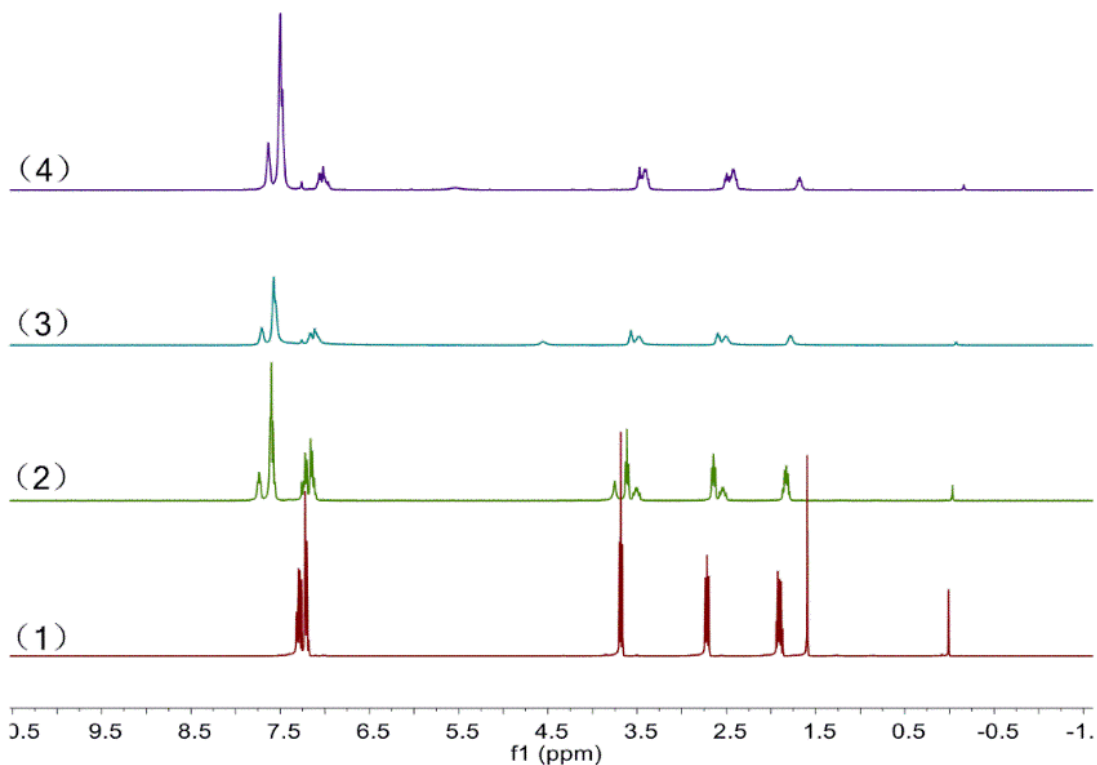

**Figure S10.**  $^1\text{H}$  NMR spectrum of PPA in  $\text{CDCl}_3$  in the presence of varied amounts of 3-(triphenylphosphonio) propanoate (**3-Ph**): (1) PPA, (2) **3-Ph**/PPA = 0.5/1, (3) **3-Ph**/PPA = 1/1, (4) **3-Ph**/PPA = 2/1.

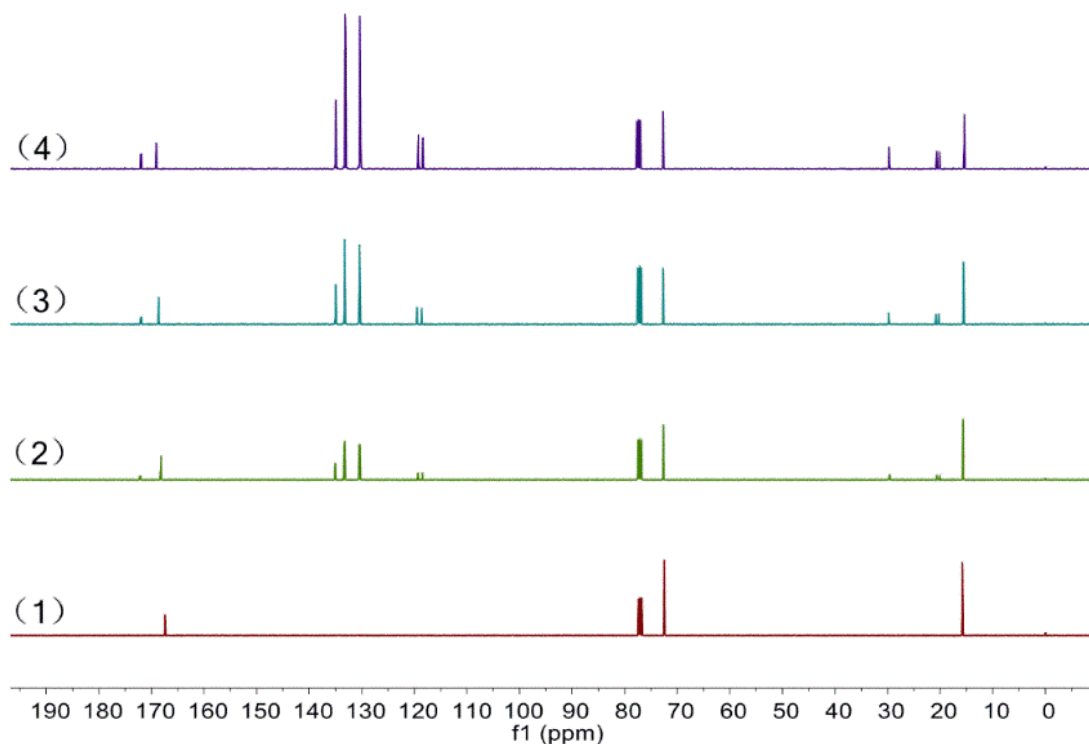

**Figure S11.**  $^{13}\text{C}$  NMR spectrum of LLA in  $\text{CDCl}_3$  in the presence of varied amounts of 3-(triphenylphosphonio) propanoate (**3-Ph**): (1) LLA; (2) **3-Ph**/LLA = 0.5/1; (3) **3-Ph**/LLA = 1/1; (4) **3-Ph**/LLA = 2/1.

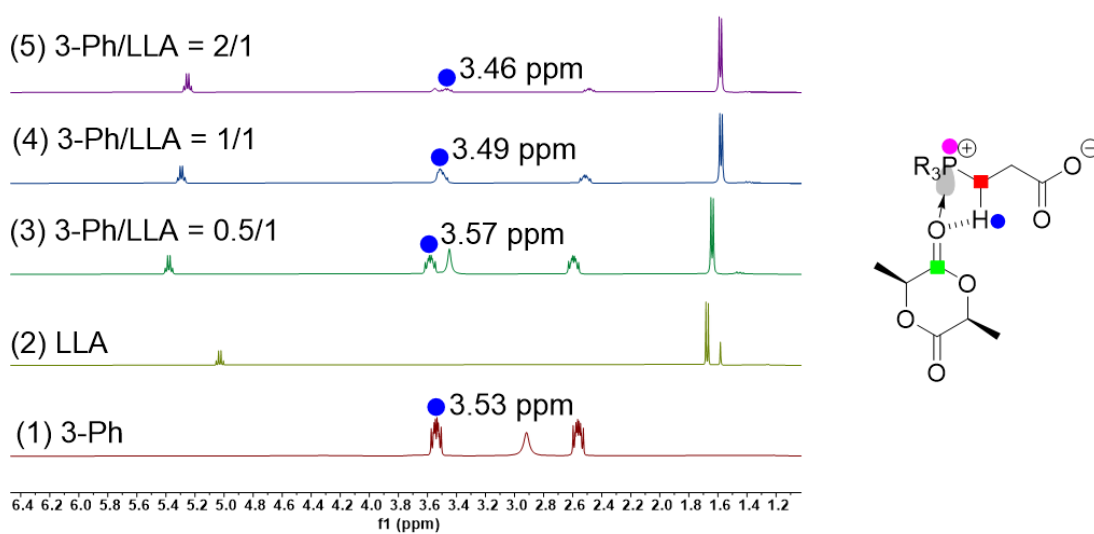

**Figure S12.** The chemical shifts of the  $\alpha\text{-C-H}$  proton (blue dots) of **3-Ph** in the  $^1\text{H}$  NMR spectra ( $\text{CDCl}_3$ ) observed in the presence of varied amounts of **3-Ph**: (1) **3-Ph**/LLA = 1/0, (2) **3-Ph**/LLA = 0/1, (3) **3-Ph**/LLA = 0.5/1, (4) **3-Ph**/LLA = 1/1, (5) **3-Ph**/LLA = 2/1.

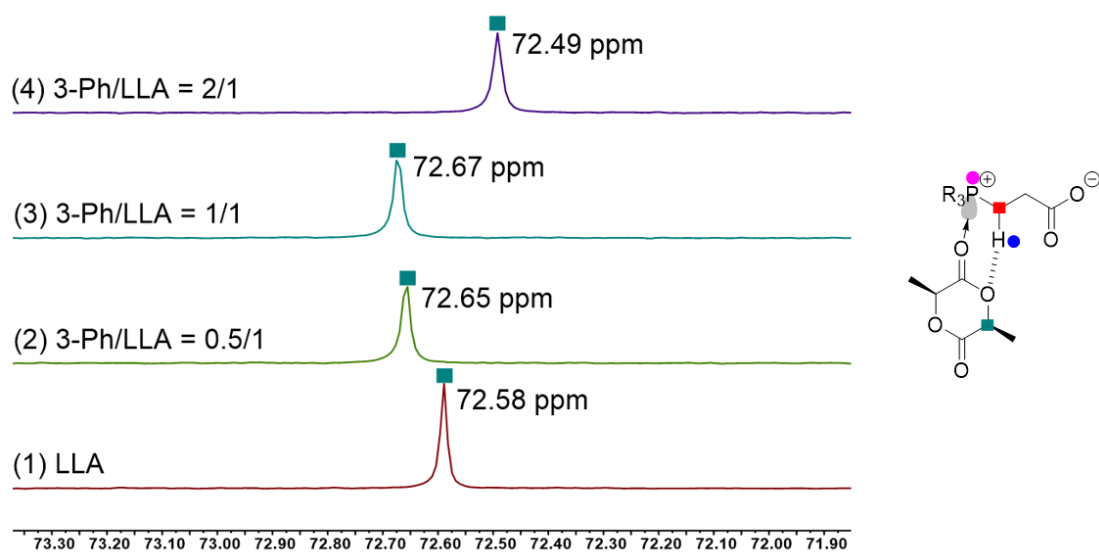

**Figure S13.** The chemical shifts of the C-H carbon (green dots) of L-LA in the  $^{13}\text{C}$  NMR spectra ( $\text{CDCl}_3$ ) observed in the presence of incremental amounts of **3-Ph**: (1) LLA; (2) **3-Ph**/LLA = 0.5/1;

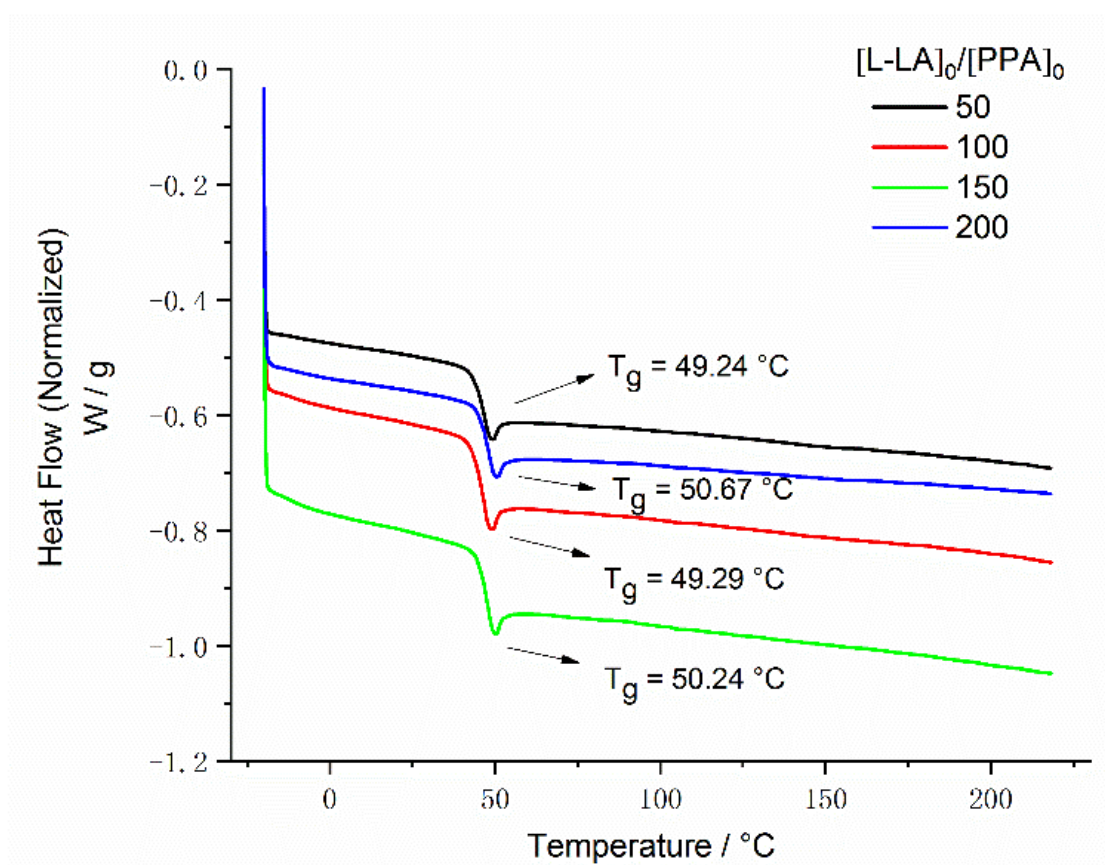

(3) **3-Ph**/LLA = 1/1; (4) **3-Ph**/LLA = 2/1.

**Figure S14.** DSC test of PLLA samples with different molecular weights.

**Table S1** Thermogravimetric analysis of quaternary phosphine carboxylate **3-R<sup>a</sup>**

| Catalyst                    | <b>3-Bu</b> | <b>3-Cy</b> | <b>3-Ph</b> | <b>3-Ph-Me</b> | <b>3-Ph-OMe</b> | <b>3-Ph-F</b> |
|-----------------------------|-------------|-------------|-------------|----------------|-----------------|---------------|
| $T_{d5\%}/^{\circ}\text{C}$ | 197         | 206         | 168         | 214            | 169             | 188           |

<sup>a</sup>Measured by TGA;  $T_{d5\%}/^{\circ}\text{C}$  represents the temperature at 5% mass loss.
